# Supplementary material
Source: HighWire-hosted journal article supplement (https://cancerres.aacrjournals.org/content/suppl/2009/05/11/0008-5472.CAN-08-4711)

Supplementary Figure 1

A

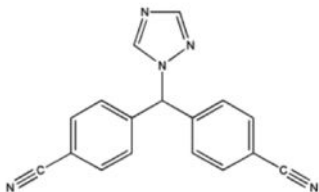

B

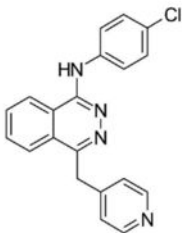

Supplement: sfig_1.pdf [file sfig_1.pdf]
